# Supplementary material for: The Biological Diversity and Production of Volatile Organic Compounds by Stem-Inhabiting Endophytic Fungi of Ecuador
Source: J Fungi (Basel). 2015 Dec 2;1(3):384–96. doi: 10.3390/jof1030384 (PMC5753131; doi:10.3390/jof1030384)
Supplement: Supplementary File 2 [file jof-01-00384-s002.xlsx]

## Sheet: Sheet1
STD: commerically available standard. MS: Mass spectrometer database. RI: retention index.						1 = compound produced. Blank = compound not produced.
Retention time (min)	Retention index	Compound ID	ID Method	E15331D	E15807C	E15802G	E15828A	E15808A	E15802A	E15317C	E15803A	E15826A	E14423E	E15016H	E15418I	E15001B	E15020A	E15015A	E14628C	E15020C	E15022A	E14904I	E14913B	E14602A	E14908H	E14616E	E15023A	E15016G	E14628B	E15527B	E14427B	E14731E	E15209N	E14504E	E15118I	E15317A	E14717E	E15506A	E14416A	E14420A	E15413E	E15517E	E15126B	E15528J	E14514J	E15120A	E14428A	E15412C	E15120B
2		Ethyl Acetate	STD	1		1						1	1	1				1						1			1			1	1		1		1	1	1	1		1			1			1	1	1	1
2.14		unknown																																															1
2.18		1-PROPANOL, 2-METHYL-	STD																																					1	1							1	1
2.94		PROPANAL, 2,2-DIMETHYL-	MS																																							1
2.98		CYCLOHEXANOL, 3-METHYL-	MS
3		Heptane	MS																											1	1			1
3.14		unknown
3.18		Propanoic acid, ethyl ester	STD																																			1									1
3.67		C5H12O	MS	1		1				1				1	1	1		1	1			1			1		1		1	1	1	1	1		1		1	1				1	1	1	1	1	1	1	1
3.87		Disulfide, dimethyl	MS									1
4.19		unknown														1																						1
4.43		1-PENTANOL	STD
4.63		Acetic acid, 2-methylpropyl ester	STD
4.68		Butanoic acid, 2-methyl-, methyl ester, (ñ)-	STD
4.73		Butanoic acid, 3-methyl-, methyl ester	STD
4.82		1,3-pentadiene, 2,3-dimethyl	MS																												1
4.85		unknown
5.42	800.414	Octane	STD																											1	1
5.47	802.283	Hexanal	RI
5.48	802.655	BUTANOIC ACID, ETHYL ESTER	RI													1																						1
6.29	830.726	2-Buten-1-ol, 3-methyl-, formate	RI
6.82	847.198	unknown
7.1	855.391	unknown														1
7.26	859.929	Butanoic acid, 2-methyl-, ethyl ester	RI													1																						1
7.85	875.838	p-Xylene	RI																												1
7.89	876.873	unknown																1
8.14	883.225	1-BUTANOL, 2-METHYL-, ACETATE	RI	1										1		1											1											1
8.4	889.627	2-METHYL-5-PROPYLFURAN	MS																	1
8.54	892.993	BENZENE, ETHENYL-	RI																			1					1
9.08	909.278	2(3H)-FURANONE, DIHYDRO-	RI
9.31	917.905	BENZENE, METHOXY-	RI
9.5	925	unknown
9.66	930.634	2-Butenoic acid, 3-methyl-, ethyl ester	MS													1
9.68	931.347	ALPHA-THUJENE	RI								1													1											1
9.98	941.874	C9H12	MS
10.09	945.654	3-HEPTANONE, 5-METHYL-	RI
10.11	946.337	ETHYL (2E)-2-METHYL-2-BUTENOATE	MS													1
10.36	954.762	C9H12	MS
10.95	973.865	Benzene, 1-ethyl-2-methyl	MS															1
11.58	993.158	Furan, 2-pentyl-	RI
11.69	996.419	unknown
11.84	1001.2	Decane	RI
11.97	1006.73	à-Phellandrene	STD								1													1											1
12.17	1015.13	unknown																																									1		1
12.25	1018.45	1,3-CYCLOHEXADIENE, 1-METHYL-4-(1-METHYLETHYL)-	RI								1													1											1
12.3	1020.51	Benzene, 1-methoxy-3-methyl-	MS																																	1
12.34	1022.16	p-Menth-8-ene, 3-methylene-	MS										1
12.45	1026.66	BENZENE, METHYL(1-METHYLETHYL)-	STD
12.49	1028.28	Benzene, 1-methyl-3-(1-methylethyl)-	RI								1													1											1
12.52	1029.5	Benzene, 1-propenyl-	MS
12.62	1033.53	CYCLOHEXENE, 3-METHYLENE-6-(1-METHYLETHYL)-	RI								1
12.67	1035.53	R-(+)-limonene	STD																					1											1
13.03	1049.73	C9H12	MS
13.13	1053.6	C9H12	MS
13.22	1057.06	C9H12	MS
13.27	1058.98	C9H12	MS
13.33	1061.26	ç-Terpinene	RI								1													1											1
13.37	1062.78	C9H12	MS
13.43	1065.05	C9H12	MS
13.73	1076.24	4-Nonanone	STD																							1
13.75	1076.98	unknown
14.09	1089.36	Cyclohexene, 1-methyl-4-(1-methylethylidene)-	STD								1													1											1
14.16	1091.87	2-NONANONE	STD									1														1
14.25	1095.08	1-UNDECENE	RI																				1
14.59	1109.32	Butanoic acid, 3-methyl-, 3-methylbutyl ester	RI													1
14.63	1111.16	BENZENEETHANOL	STD	1							1					1																	1										1			1			1
14.7	1114.37	Benzene, 1-ethyl-4-methoxy-	STD																			1
15.73	1159.87	Cyclohexanone, 5-methyl-2-(1-methylethyl)-	RI								1
16.09	1175.08	CYCLOHEXANOL, 5-METHYL-2-(1-METHYLETHYL)-, (1à,2à,5á)-	RI								1
16.2	1179.66	Cyclohexene,1-(2-methylpropyl)-	MS
16.22	1180.48	CYCLOPENTANE, 1-ISOBUTYLIDEN-3-METHYL-	MS								1
16.26	1182.14	3-Cyclohexen-1-ol, 4-methyl-1-(1-methylethyl)-, acetate	STD																					1											1
16.41	1188.31	2-Cyclohexen-1-ol, 2-methyl-5-(1-methylethenyl)-	RI								1
16.95	1212.57	1-HEXANOL, 2-ETHYL-, ACETATE	STD																								1
17.17	1223.39	Carane, 4,5-epoxy-, trans	MS
17.36	1232.63	unknown
17.5	1239.37	C9H12	MS
17.89	1257.87	ACETIC ACID, 2-PHENYLETHYL ESTER	STD																			1
18.24	1274.13	Cyclodecane	MS
18.63	1291.89	Cyclohexene, 4-methyl-1-(1-methylethyl)-	MS								1
18.74	1296.83	unknown sesquiterpenoid
19.63	1342.71	unknown sesquiterpenoid
19.88	1355.39	unknown sesquiterpenoid
20.02	1362.42	unknown sesquiterpenoid
20.41	1381.76	unknown sesquiterpenoid																															1
20.56	1389.09	unknown sesquiterpenoid
20.77	1399.28	unknown sesquiterpenoid
20.88	1405.35	unknown sesquiterpenoid
21.05	1414.87	unknown sesquiterpenoid
21.08	1416.55	unknown sesquiterpenoid																									1
21.13	1419.33	unknown
21.2	1423.04	unknown sesquiterpenoid
21.21	1423.76	unknown sesquiterpenoid																																														1
21.23	1424.87	unknown sesquiterpenoid
21.33	1430.39	unknown sesquiterpenoid
21.38	1433.14	unknown sesquiterpenoid
21.44	1436.43	unknown sesquiterpenoid
21.45	1436.97	unknown sesquiterpenoid																									1
21.39	1433.68	unknown sesquiterpenoid
21.46	1437.52	unknown sesquiterpenoid
21.47	1438.07	unknown sesquiterpenoid																																									1						1
21.58	1444.07	unknown sesquiterpenoid
21.59	1444.61	unknown sesquiterpenoid																																															1
21.8	1455.98	unknown sesquiterpenoid
21.83	1457.59	unknown sesquiterpenoid
21.91	1461.88	unknown sesquiterpenoid
21.94	1463.49	unknown sesquiterpenoid
21.99	1466.16	unknown sesquiterpenoid
22.08	1470.96	unknown sesquiterpenoid
22.13	1473.61	unknown sesquiterpenoid
22.23	1478.91	unknown sesquiterpenoid
22.24	1479.44	unknown sesquiterpenoid
22.29	1482.07	unknown sesquiterpenoid																																														1
22.32	1483.65	unknown sesquiterpenoid
22.33	1484.18	unknown sesquiterpenoid																																														1
22.34	1484.7	unknown sesquiterpenoid																																														1
22.41	1488.38	unknown sesquiterpenoid
22.43	1489.42	unknown sesquiterpenoid
22.48	1492.04	unknown sesquiterpenoid
22.49	1492.56	unknown sesquiterpenoid
22.62	1499.33	unknown sesquiterpenoid
22.67		unknown sesquiterpenoid																																						1
22.68		unknown sesquiterpenoid				1														1
22.69		unknown sesquiterpenoid
22.71		unknown sesquiterpenoid
22.83		unknown sesquiterpenoid
22.85		unknown sesquiterpenoid																																														1
22.87		unknown sesquiterpenoid
23.03		unknown sesquiterpenoid
23.12		unknown sesquiterpenoid
23.37		unknown sesquiterpenoid																																														1
24.55		unknown sesquiterpenoid
24.94		unknown sesquiterpenoid
25.05		unknown sesquiterpenoid
25.42		unknown sesquiterpenoid
25.56		unknown sesquiterpenoid
25.77		unknown sesquiterpenoid
25.88		unknown sesquiterpenoid
25.91		unknown sesquiterpenoid
27.37		unknown
27.78		unknown
29.31		unknown
29.95		unknown
[truncated: 67 more columns]
